# Supplementary material
Source: Springer Nature journal article supplement (https://www.springermedizin.de/resource/supplementary/12950_2011_200_MOESM2_ESM.pdf/9558186)

# NORMAL SKIN

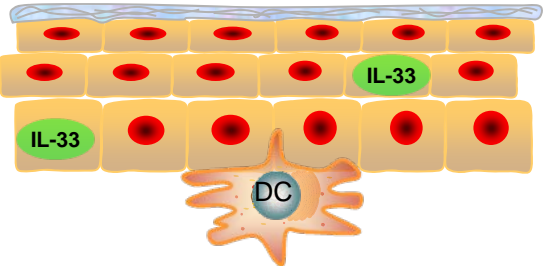

# ATOPIC DERMATITIS

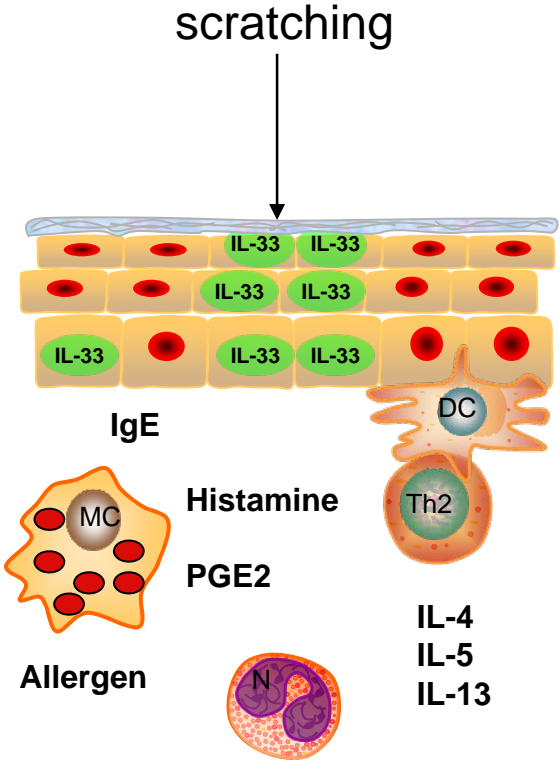

# PSORIATIC SKIN

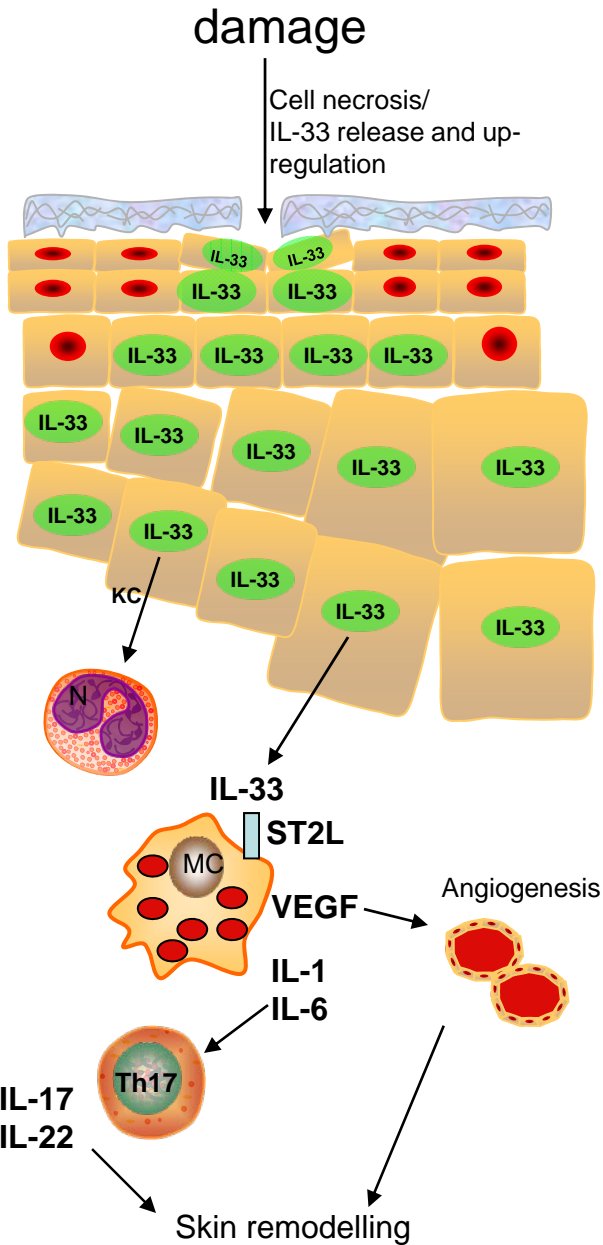

Supplement: MOESM2 [file 9558186]
